# Supplementary material for: Life’s Essential 8 is inversely associated with high-sensitivity C-reactive protein
Source: PubMed Central journal article supplement (PMC11217377; doi:10.1038/s41598-024-65977-3), 2024-07-01
Supplement: 41598_2024_65977_MOESM1_ESM.pdf [file 41598_2024_65977_MOESM1_ESM.pdf]

## **Life's Essential 8 is inversely associated with high-sensitivity C-reactive protein**

Lana Hebib<sup>1</sup>, Angel Herraiz-Adillo<sup>1</sup>, Sara Higuera-Fresnillo<sup>1-2</sup>, Daniel Berglind<sup>3-4</sup>, Bledar Daka<sup>5</sup>, Patrik Wennberg<sup>6</sup>, Emil Hagström<sup>7</sup>, Cecilia Lenander<sup>8</sup>, Viktor H. Ahlqvist<sup>9-10</sup>, Carl Johan Östgren<sup>1,11</sup>, Karin Rådholm<sup>\*1,12</sup>, Pontus Henriksson<sup>\*1</sup>

<sup>1</sup> Department of Health, Medicine and Caring Sciences, Linköping University, Linköping, Sweden.

<sup>2</sup> Department Physical Education, Sport and Human Motricity, Universidad Autónoma de Madrid, Spain.

<sup>3</sup> Department of Global Public Health, Karolinska Institutet, Stockholm, Sweden.

<sup>4</sup> Centre for Epidemiology and Community Medicine, Region Stockholm, Stockholm, Sweden.

<sup>5</sup> School of Public Health and Community Medicine, Institute of Medicine, Sahlgrenska Academy, University of Gothenburg, Gothenburg, Sweden.

<sup>6</sup> Department of Public Health and Clinical Medicine, Umeå University, Umeå, Sweden.

<sup>7</sup> Department of Medical Sciences, Cardiology, Uppsala University, Uppsala, Sweden.

<sup>8</sup> Department of Clinical Sciences in Malmö, Centre for Primary Health Care Research, Lund University, Lund, Sweden.

<sup>9</sup> Department of Biomedicine, Aarhus University, Aarhus, Denmark.

<sup>10</sup> Institute of Environmental Medicine, Karolinska Institutet, Stockholm, Sweden.

<sup>11</sup> Centre for Medical Image Science and Visualization (CMIV), Linköping university, Linköping, Sweden.

<sup>12</sup> The George Institute for Global Health, University of New South Wales, Sydney, Australia.

\*These authors contributed equally to this article and are joint senior authors.

## **Supplementary material**

**Supplementary Table 1.** Odds ratios for the continuous (splines) associations of LE8 global, LE8 health behaviors and LE8 health factors scores with high-risk hs-CRP

**Supplementary Table 2.** Odds ratios for the categorical associations of LE8 global, LE8 health behaviors and LE8 health factors scores with high-risk hs-CRP

**Supplementary Table 3.** Odds ratios for the associations of LE8 health behaviors and LE8 health factors Z scores with high-risk hs-CRP

**Supplementary Table 4.** Sensitivity analysis, odds ratios for the associations of global LE8 score and LE8 health behavior score with high-risk hs-CRP considering a conservative cut-off for physical activity (300 minutes of moderate or greater intensity of physical activity per week)

**Supplementary Table 5.** Sensitivity analysis, odds ratios for the associations of global LE8 score with high-risk hs-CRP considering additional adjustments for economic status and history of cardiovascular disease

**Supplementary Table 6.** Sensitivity analysis, odds ratios for the association of global LE8 score with high-risk hs-CRP including participants (n=665) with hs-CRP >10 mg/L

**Supplementary Figure 1.** Odds ratios for the association of LE8 scores with high-risk hs-CRP by sex

**Supplementary Table 1.** Odds ratios for the continuous (splines) associations of LE8 global, LE8 health behaviors and LE8 health factors scores with high-risk hs-CRP

|                             | <b>Unadjusted</b>   | <b>Adjusted<sup>1</sup></b> |
|-----------------------------|---------------------|-----------------------------|
| <b>LE8 global</b>           | <b>OR (95% CI)</b>  | <b>OR (95% CI)</b>          |
| 30                          | 17.04 (13.88-20.93) | 16.25 (13.14-20.09)         |
| 40                          | 9.88 (8.60-11.36)   | 9.67 (8.36-11.18)           |
| 50                          | 5.73 (5.21-6.31)    | 5.75 (5.20-6.36)            |
| 60                          | 3.30 (2.99-3.63)    | 3.38 (3.06-3.74)            |
| 70                          | 1.80 (1.70-1.91)    | 1.84 (1.74-1.96)            |
| 80                          | Reference           | Reference                   |
| 90                          | 0.61 (0.52-0.71)    | 0.60 (0.51-0.69)            |
| 100                         | 0.38 (0.27-0.53)    | 0.36 (0.26-0.50)            |
| <b>LE8 health behaviors</b> | <b>OR (95 % CI)</b> | <b>OR (95 % CI)</b>         |
| 30                          | 3.16 (2.63-3.79)    | 2.53 (2.10-3.06)            |
| 40                          | 2.54 (2.24-2.89)    | 2.13 (1.87-2.44)            |
| 50                          | 2.05 (1.87-2.25)    | 1.79 (1.63-1.98)            |
| 60                          | 1.64 (1.50-1.79)    | 1.50 (1.37-1.65)            |
| 70                          | 1.29 (1.20-1.39)    | 1.24 (1.15-1.33)            |
| 80                          | Reference           | Reference                   |
| 90                          | 0.87 (0.78-0.97)    | 0.87 (0.78-0.96)            |
| 100                         | 0.79 (0.61-1.01)    | 0.77 (0.60-0.99)            |
| <b>LE8 health factors</b>   | <b>OR (95 % CI)</b> | <b>OR (95 % CI)</b>         |
| 30                          | 6.61 (5.93-7.37)    | 6.93 (6.19-7.77)            |
| 40                          | 4.32 (3.94-4.74)    | 4.54 (4.12-5.00)            |
| 50                          | 2.86 (2.59-3.15)    | 3.00 (2.71-3.32)            |
| 60                          | 1.96 (1.80-2.13)    | 2.04 (1.87-2.22)            |
| 70                          | 1.41 (1.35-1.46)    | 1.44 (1.38-1.49)            |
| 80                          | Reference           | Reference                   |
| 90                          | 0.69 (0.63-0.75)    | 0.68 (0.62-0.74)            |
| 100                         | 0.47 (0.38-0.57)    | 0.45 (0.37-0.55)            |

<sup>1</sup> Odds ratios were adjusted for age, sex, study center, education, and alcohol use. CI: confidence interval, CVH: cardiovascular health status, hs-CRP: high-sensitivity C-reactive protein, LE8: Life's Essential 8, OR: odds ratio.

**Supplementary Table 2.** Odds ratios for the categorical associations of LE8 global, LE8 health behaviors and LE8 health factors scores with high-risk hs-CRP

|                             | <b>Unadjusted</b>  | <b>Adjusted<sup>1</sup></b> |
|-----------------------------|--------------------|-----------------------------|
| <b>LE8 global</b>           | <b>OR (95% CI)</b> | <b>OR (95% CI)</b>          |
| ≤49                         | 9.11 (7.80-10.66)  | 8.80 (7.47-10.37)           |
| 50-79                       | 3.00 (2.69-3.35)   | 3.03 (2.71-3.40)            |
| ≥80                         | Reference          | Reference                   |
| <b>LE8 health behaviors</b> | <b>OR (95% CI)</b> | <b>OR (95% CI)</b>          |
| ≤49                         | 2.65 (2.32-3.02)   | 2.34 (2.04-2.68)            |
| 50-79                       | 1.55 (1.44-1.67)   | 1.49 (1.38-1.60)            |
| ≥80                         | Reference          | Reference                   |
| <b>LE8 health factors</b>   | <b>OR (95% CI)</b> | <b>OR (95% CI)</b>          |
| ≤49                         | 6.00 (5.37-6.70)   | 6.46 (5.75-7.26)            |
| 50-79                       | 2.39 (2.16-2.65)   | 2.50 (2.25-2.78)            |
| ≥80                         | Reference          | Reference                   |

<sup>1</sup> Odds ratios were adjusted for age, sex, study center, education and alcohol use. CI: confidence interval, CVH: cardiovascular health status, hs-CRP: high-sensitivity C-reactive protein, LE8: Life's Essential 8, OR: odds ratio.

**Supplementary Table 3.** Odds ratios for the associations of LE8 health behaviors and LE8 health factors Z scores with high-risk hs-CRP

|                             | Unadjusted       |        | Adjusted <sup>1</sup> |        |
|-----------------------------|------------------|--------|-----------------------|--------|
|                             | OR (95% CI)      | P      | OR (95% CI)           | P      |
| <b>LE8 health behaviors</b> |                  |        |                       |        |
| Diet                        | 0.90 (0.87-0.93) | <0.001 | 0.88 (0.85-0.91)      | <0.001 |
| Physical activity           | 0.82 (0.80-0.84) | <0.001 | 0.84 (0.82-0.86)      | <0.001 |
| Smoking                     | 0.82 (0.80-0.85) | <0.001 | 0.86 (0.81-0.89)      | <0.001 |
| Sleep                       | 0.87 (0.85-0.90) | <0.001 | 0.90 (0.87-0.93)      | <0.001 |
| <b>LE8 health factors</b>   |                  |        |                       |        |
| BMI                         | 0.48 (0.46-0.49) | <0.001 | 0.48 (0.47-0.50)      | <0.001 |
| Non-HDL cholesterol         | 0.83 (0.81-0.86) | <0.001 | 0.84 (0.81-0.87)      | <0.001 |
| Blood glucose               | 0.70 (0.68-0.73) | <0.001 | 0.70 (0.68-0.73)      | <0.001 |
| Blood pressure              | 0.73 (0.70-0.75) | <0.001 | 0.71 (0.69-0.74)      | <0.001 |

LE8 health behaviors and LE8 health factors are summarized as Z scores (mean=0, SD=1).  
<sup>1</sup> Odds ratios were adjusted for age, sex, study center, education level, and alcohol use.  
 CI: confidence intervals, CVH: cardiovascular health, HDL: high-density lipoprotein, hs-CRP: high-sensitivity C-reactive protein, LE8: Life's Essential 8, OR: odds ratio, SD: standard deviation.

**Supplementary Table 4.** Sensitivity analysis, odds ratios for the associations of global LE8 score and LE8 health behavior score with high-risk hs-CRP considering a conservative cut-off for physical activity (300 minutes of moderate or greater intensity of physical activity per week)

|                             | <b>OR<sup>1</sup> (95% CI)</b> | <b>P</b> |
|-----------------------------|--------------------------------|----------|
| <b>LE8 global</b>           |                                |          |
| ≤49                         | 9.48 (8.12-11.05)              | <0.001   |
| 50-79                       | 2.93 (2.60-3.29)               | <0.001   |
| ≥80                         | Reference                      |          |
| <b>LE8 health behaviors</b> |                                |          |
| ≤49                         | 2.67 (2.37-3.02)               | <0.001   |
| 50-79                       | 1.52 (1.41-1.64)               | <0.001   |
| ≥80                         | Reference                      |          |

<sup>1</sup> Odds ratios were adjusted for age, sex, study center, education level and alcohol use.

CI: confidence intervals, hs-CRP: high-sensitivity C-reactive protein, LE8: Life's Essential 8, OR: odds ratio.

**Supplementary Table 5.** Sensitivity analysis, odds ratios for the associations of global LE8 score with high-risk hs-CRP considering additional adjustments for economic status and history of cardiovascular disease

| <b>Main analysis</b>                                             |                                |          |
|------------------------------------------------------------------|--------------------------------|----------|
| <b>LE8 global score</b>                                          | <b>OR<sup>1</sup> (95% CI)</b> | <b>P</b> |
| ≤49                                                              | 8.80 (7.47-10.37)              | <0.001   |
| 50-79                                                            | 3.03 (2.71-3.40)               | <0.001   |
| ≥80                                                              | Reference                      |          |
| <b>Main analysis + economic status</b>                           |                                |          |
| <b>LE8 global score</b>                                          | <b>OR<sup>2</sup> (95% CI)</b> | <b>P</b> |
| ≤49                                                              | 8.05 (6.81-9.52)               | <0.001   |
| 50-79                                                            | 2.91 (2.60-3.26)               | <0.001   |
| ≥80                                                              | Reference                      |          |
| <b>Main analysis + history of cardiovascular diseases status</b> |                                |          |
| <b>LE8 global score</b>                                          | <b>OR<sup>3</sup> (95% CI)</b> | <b>P</b> |
| ≤49                                                              | 8.60 (7.28-10.16)              | <0.001   |
| 50-79                                                            | 2.97 (2.66-3.33)               | <0.001   |
| ≥80                                                              | Reference                      |          |

<sup>1</sup> Odds ratios were adjusted for age, sex, study center, education level and alcohol use.

<sup>2</sup> Additional adjustment for economic status.

<sup>3</sup> Additional adjustment for history of cardiovascular disease (self-reported myocardial infarction, coronary artery bypass grafting, percutaneous coronary intervention, stroke, or peripheral arterial disease intervention).

CI: confidence intervals, hs-CRP: high-sensitivity C-reactive protein, LE8: Life's Essential 8, OR: odds ratio.

**Supplementary Table 6.** Sensitivity analysis, odds ratios for the association of global LE8 score with high-risk hs-CRP including participants (n=665) with hs-CRP >10 mg/L

| <b>LE8 global</b>           | <b>OR<sup>1</sup> (95% CI)</b> |
|-----------------------------|--------------------------------|
| ≤49                         | 8.38 (7.17-9.79)               |
| 50-79                       | 2.84 (2.56-3.14)               |
| ≥80                         | Reference                      |
| <b>LE8 health behaviors</b> | <b>OR (95% CI)</b>             |
| ≤49                         | 2.28 (1.99-2.60)               |
| 50-79                       | 1.43 (1.33-1.53)               |
| ≥80                         | Reference                      |
| <b>LE8 health factors</b>   | <b>OR (95% CI)</b>             |
| ≤49                         | 5.89 (5.28-6.56)               |
| 50-79                       | 2.33 (2.12-2.57)               |
| ≥80                         | Reference                      |

<sup>1</sup> Odds ratios were adjusted for age, sex, study center, education and alcohol use.  
 CI: confidence interval, CVH: cardiovascular health status, hs-CRP: high-sensitivity C-reactive protein, LE8: Life's Essential 8, OR: odds ratio.



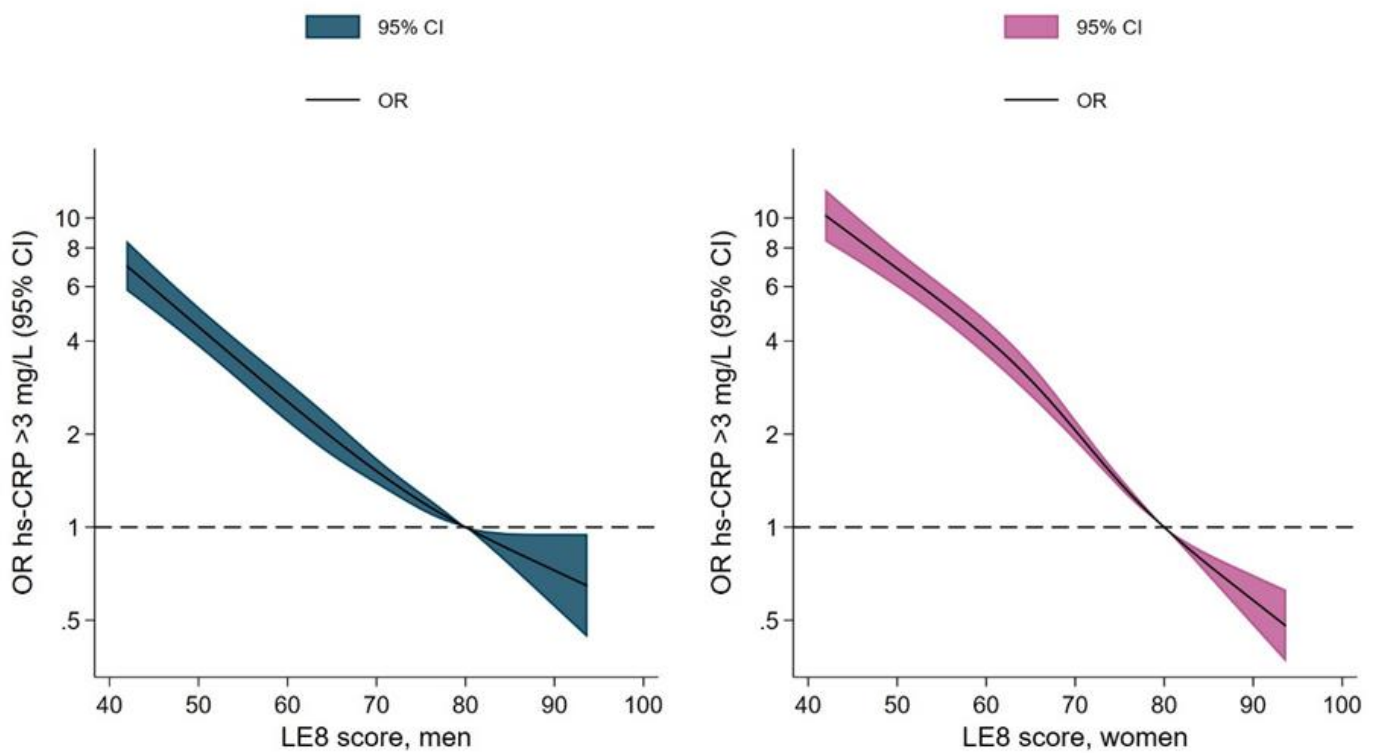

**Supplementary Figure 1.** Odds ratios for the association of LE8 scores with high-risk hs-CRP by sex.

Spline analyses show adjusted odds ratios (solid line) and 95% confidence intervals (colored area) for high-risk hs-CRP (>3.0 mg/L) according to LE8 scores.

Odds ratios were adjusted for age, study center, education and alcohol use.

Reference categories were set at 80 points. X-axes were truncated at the 1st and 99th percentile of LE8 values.

CI: confidence interval, hs-CRP: high-sensitivity C-reactive protein, LE8: Life's Essential 8 score, OR: odds ratio.
